# Supplementary material
Source: PubMed Central journal article supplement (PMC2987944)

**Fig. S1**

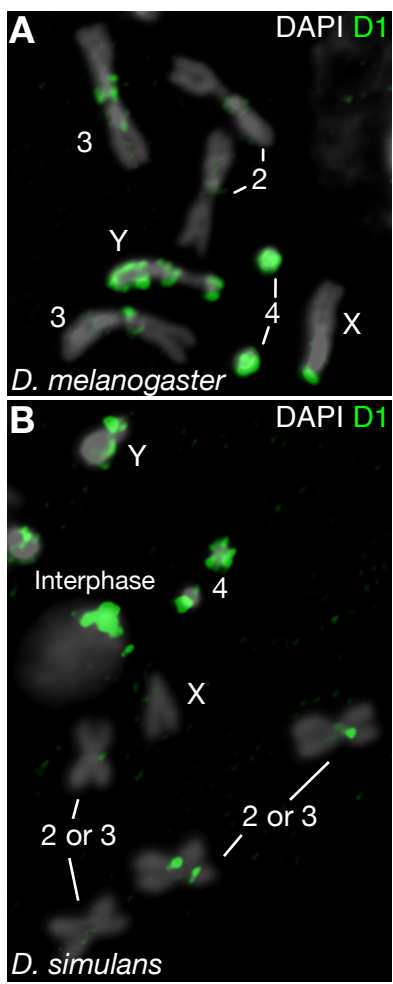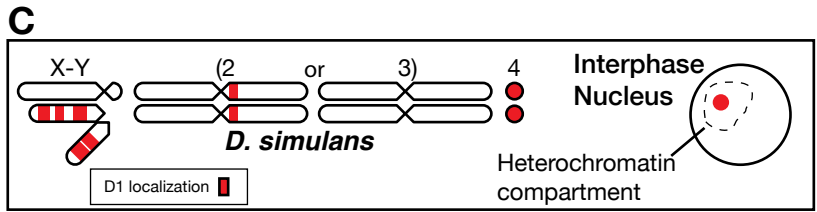

Supplement: NIHMS168448-supplement-SFigure_1.pdf [file NIHMS168448-supplement-SFigure_1.pdf]

**Fig. S2**

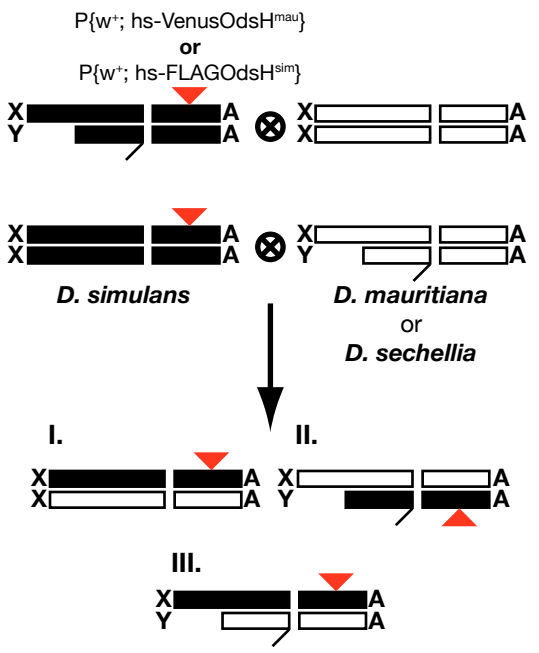

Supplement: NIHMS168448-supplement-SFigure_2.pdf [file NIHMS168448-supplement-SFigure_2.pdf]

**Fig. S3**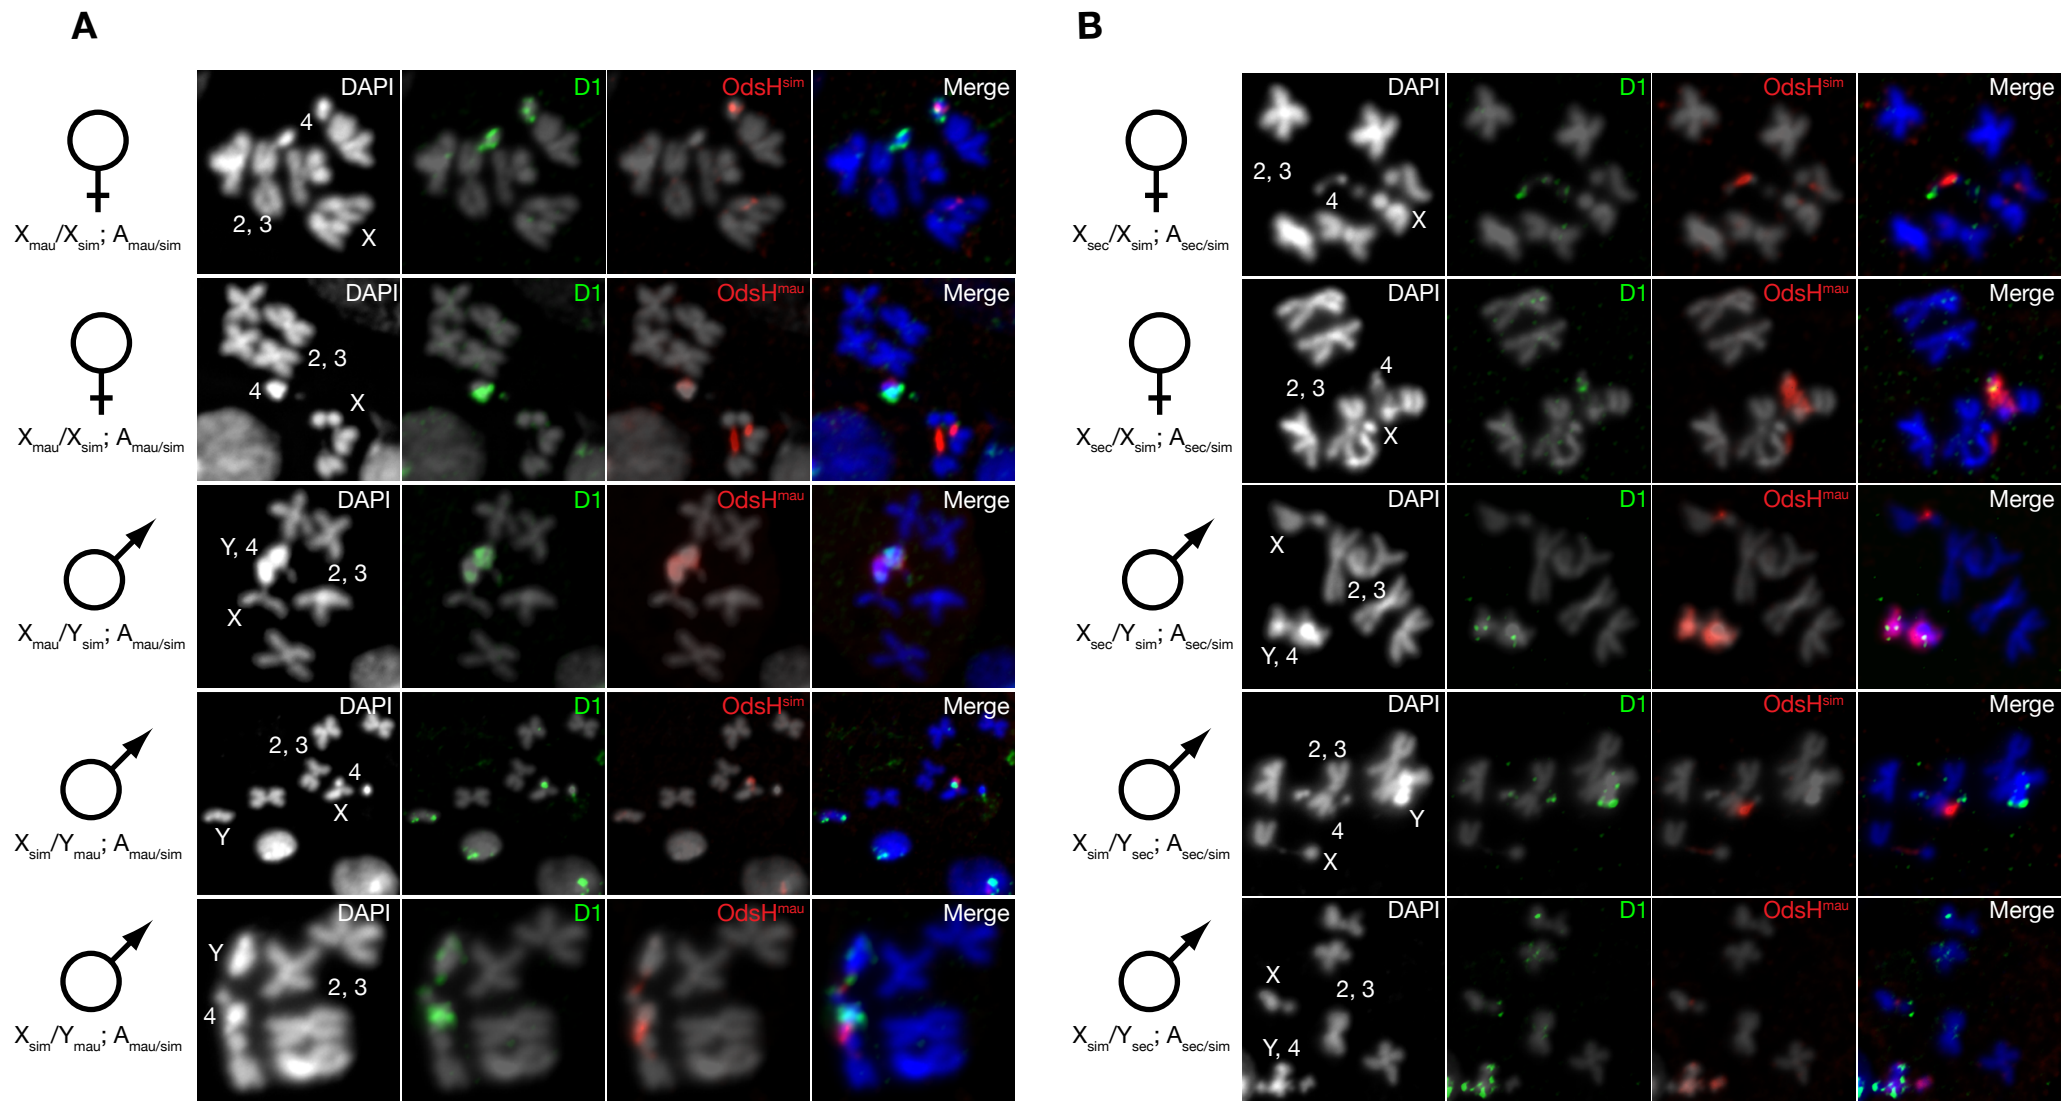

Supplement: NIHMS168448-supplement-SFigure_3.pdf [file NIHMS168448-supplement-SFigure_3.pdf]

**Fig. S4**

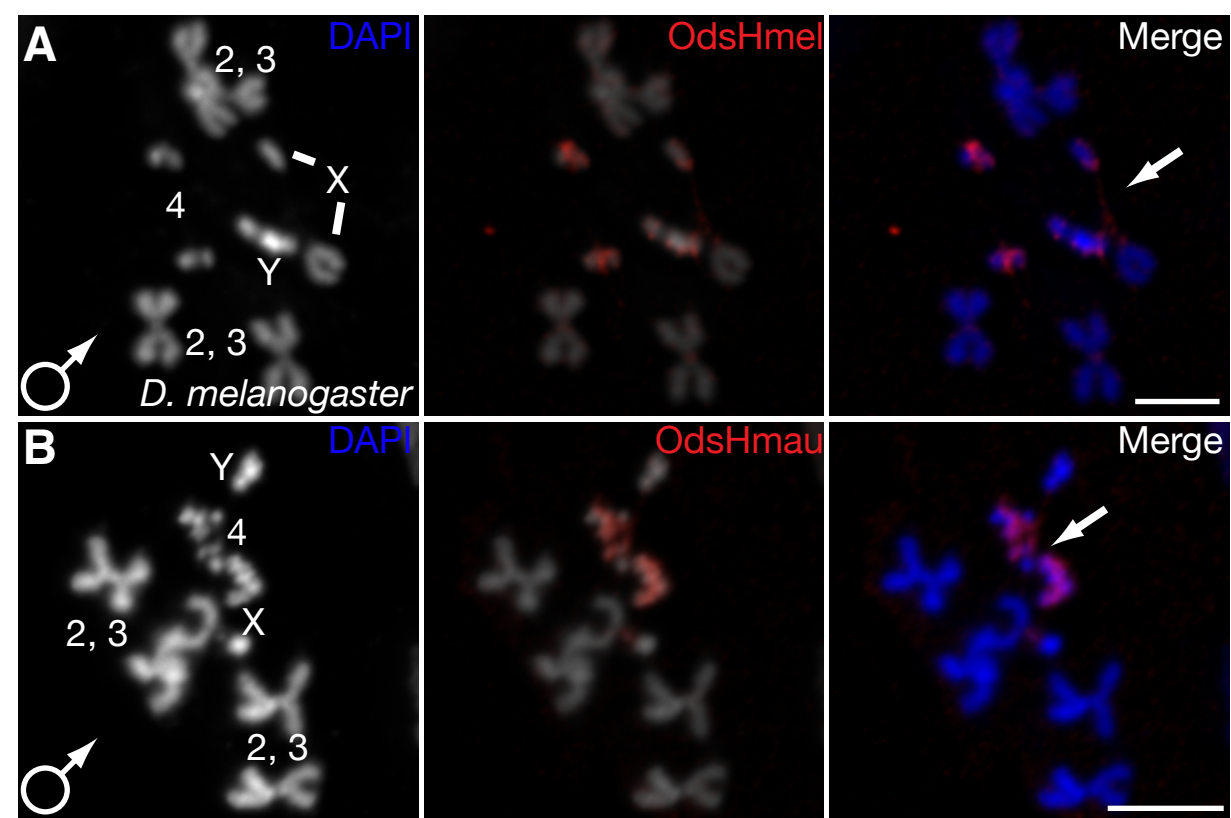

Supplement: NIHMS168448-supplement-SFigure_4.pdf [file NIHMS168448-supplement-SFigure_4.pdf]

**Fig. S5**

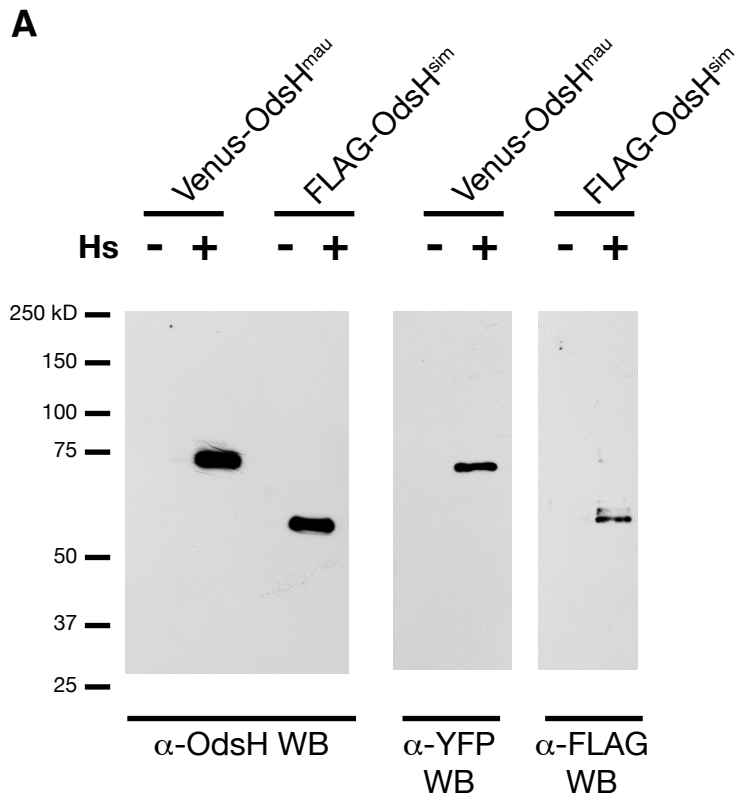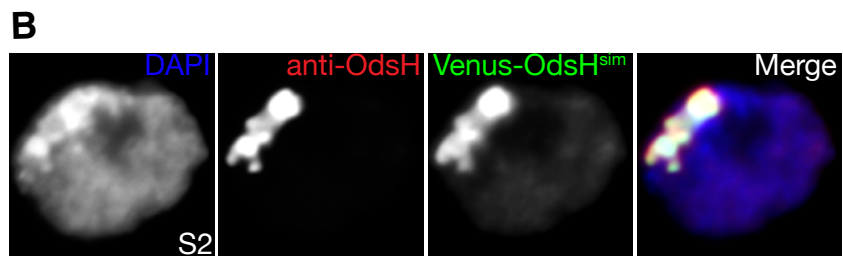

Supplement: NIHMS168448-supplement-SFigure_5.pdf [file NIHMS168448-supplement-SFigure_5.pdf]

Fig. S6

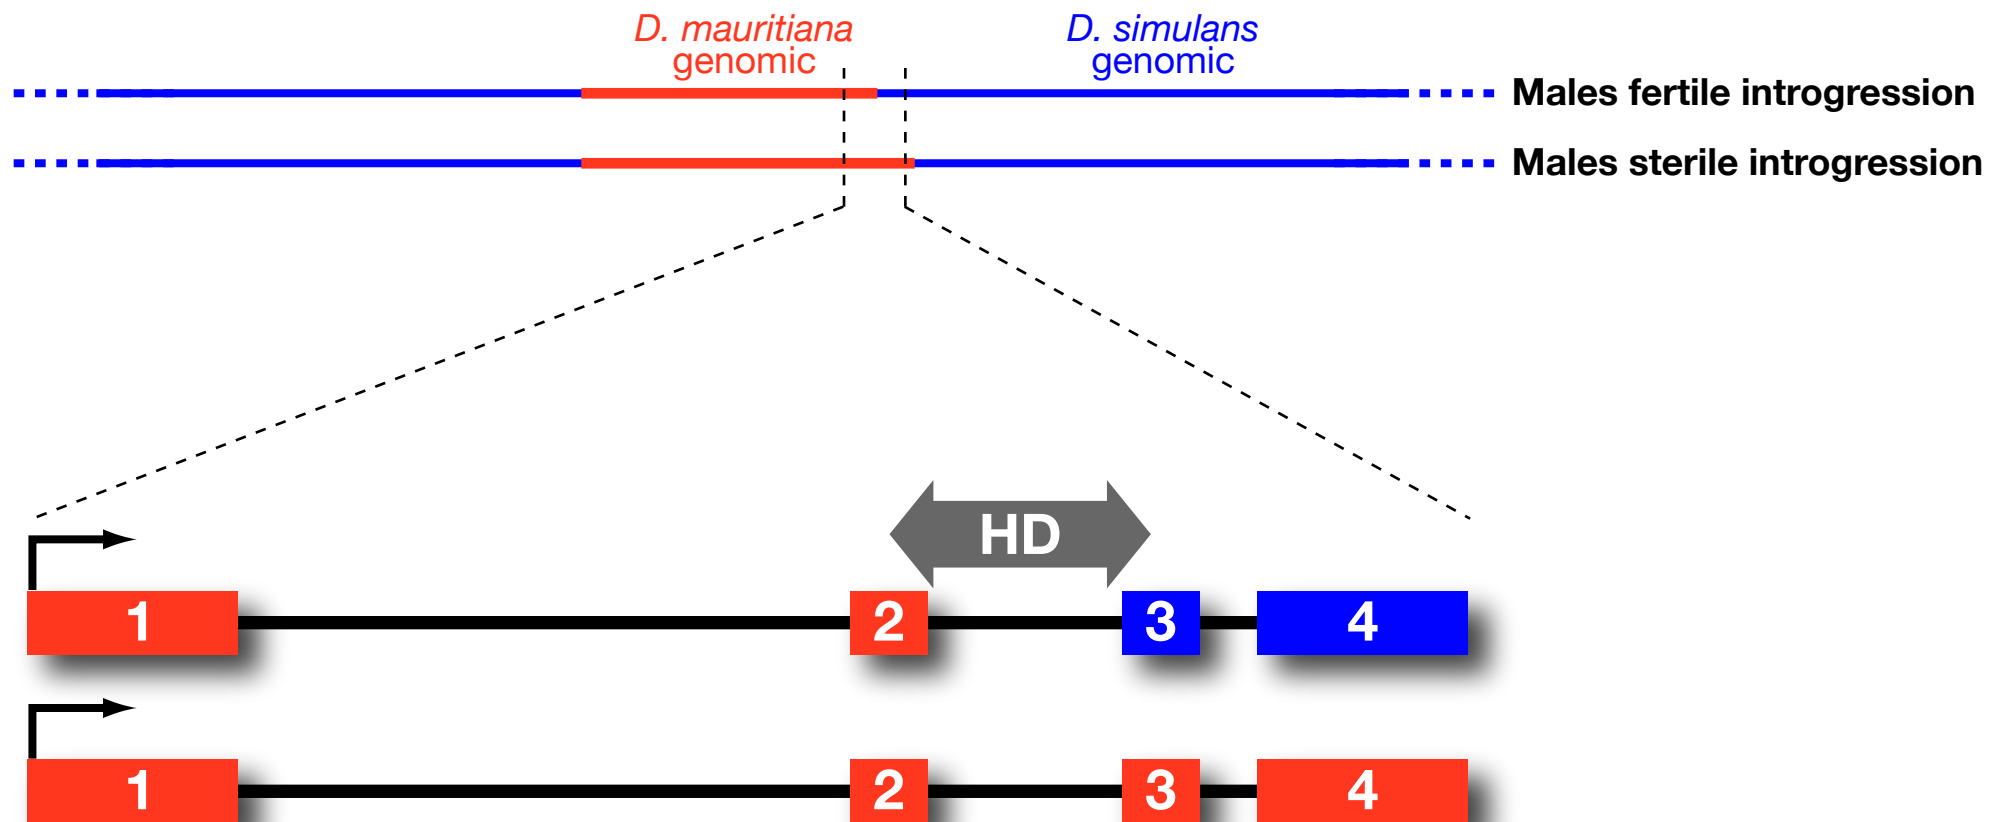

Supplement: NIHMS168448-supplement-SFigure_6.pdf [file NIHMS168448-supplement-SFigure_6.pdf]

**Fig. S7**

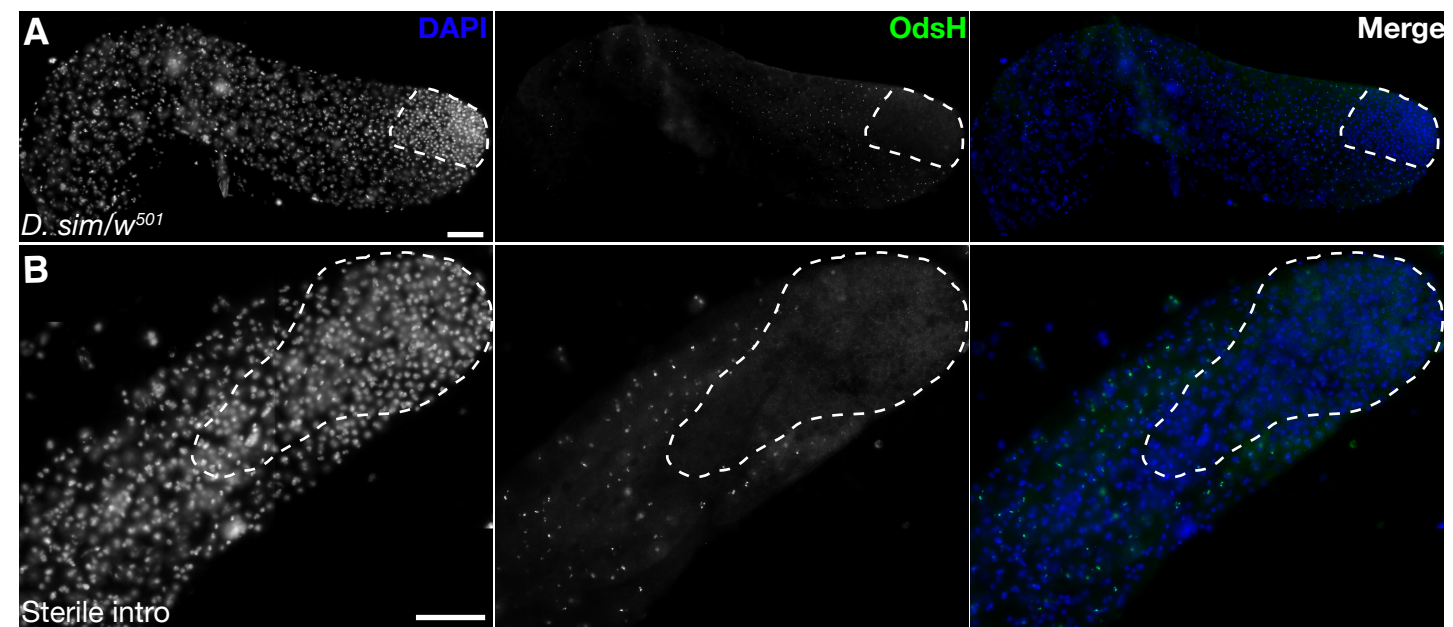

Supplement: NIHMS168448-supplement-SFigure_7.pdf [file NIHMS168448-supplement-SFigure_7.pdf]

**Fig. S8**

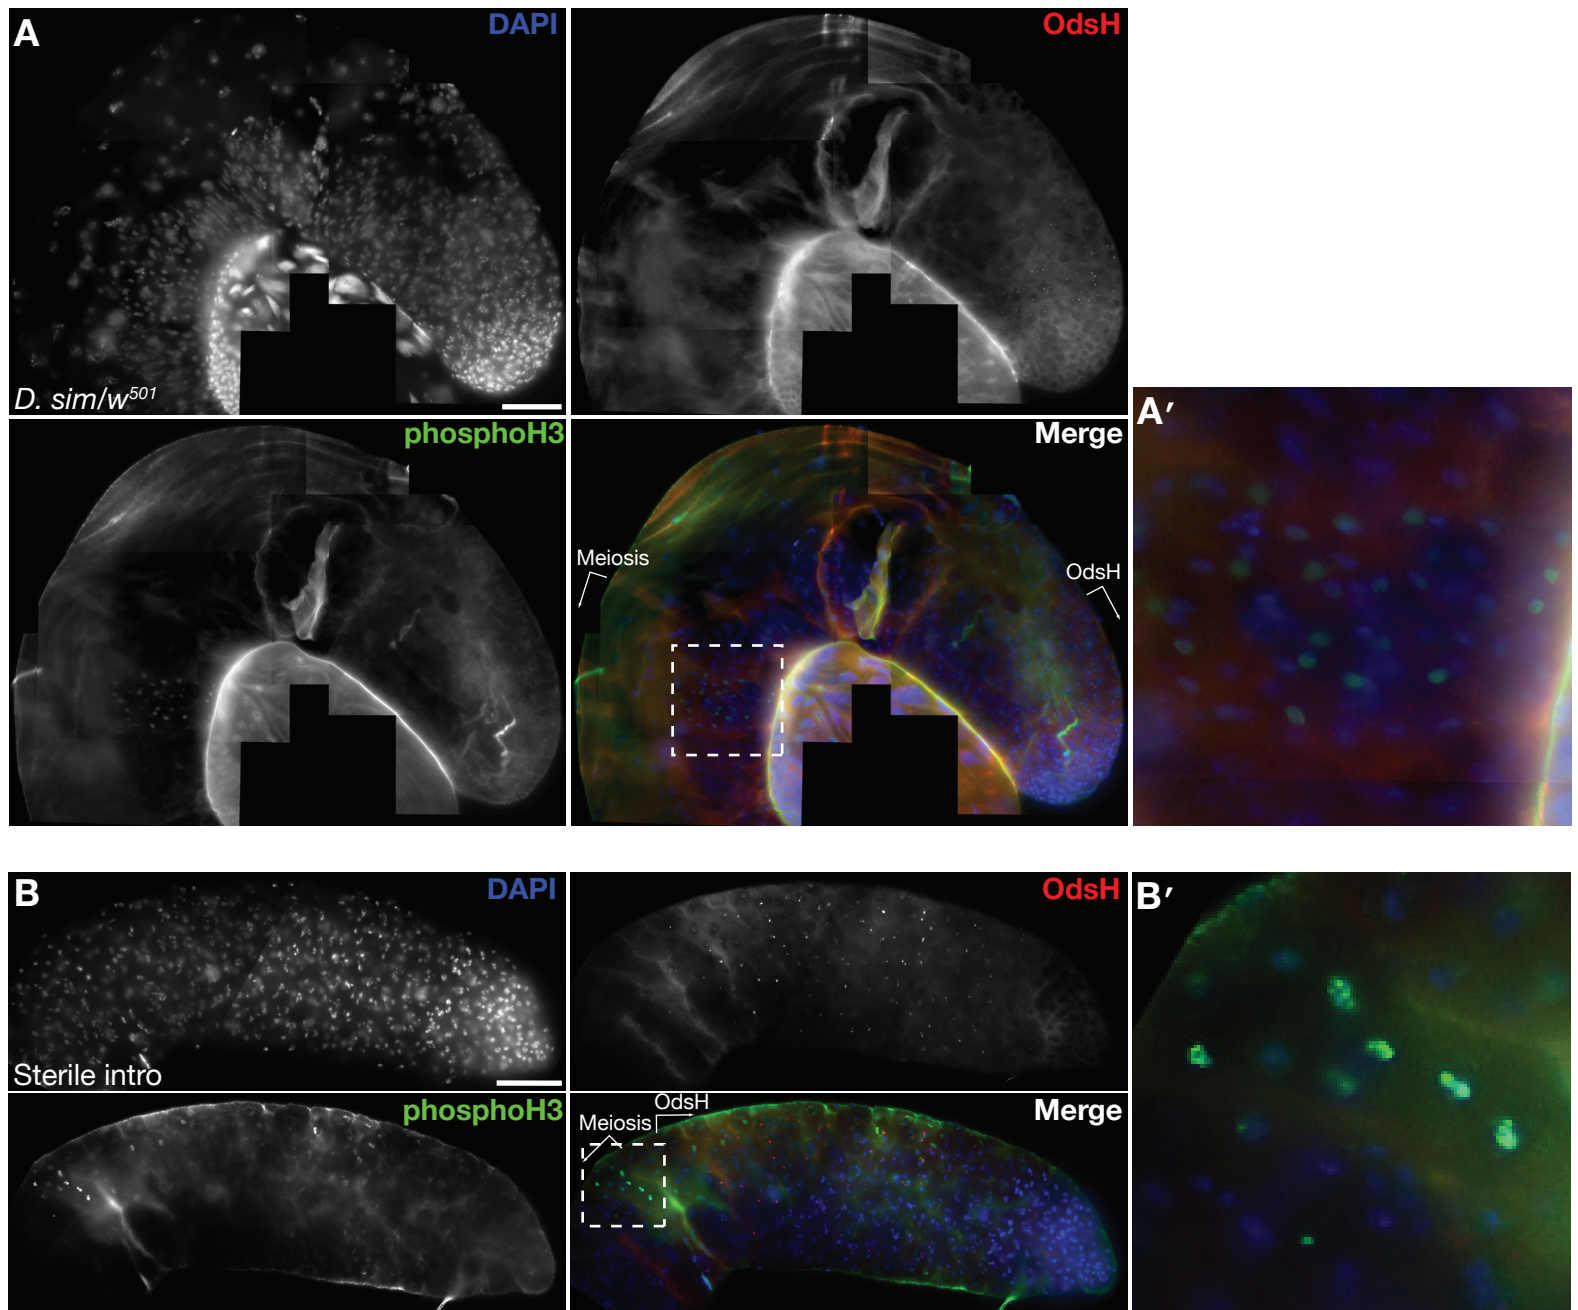

Supplement: NIHMS168448-supplement-SFigure_8.pdf [file NIHMS168448-supplement-SFigure_8.pdf]
